# Supplementary material for: Epidemiology, Endovascular Treatment, and Prognosis of Cerebral Venous Thrombosis: US Center Study of 152 Patients
Source: PubMed Central journal article supplement — J Am Heart Assoc. 2017 Jun 13;6(6):e005480. doi: 10.1161/JAHA.117.005480 (PMC5669171; doi:10.1161/jaha.117.005480), 2017-06-13
Supplement: JAH3-6-e005480-s001.pdf [file JAH3-6-e005480-s001.pdf]

# **SUPPLEMENTAL MATERIAL**

**Figure S1.** Comparative receiver operator characteristic (ROC) curve with area under the ROC presented for the full model ("Model") and cross-validated model ("ROC1").

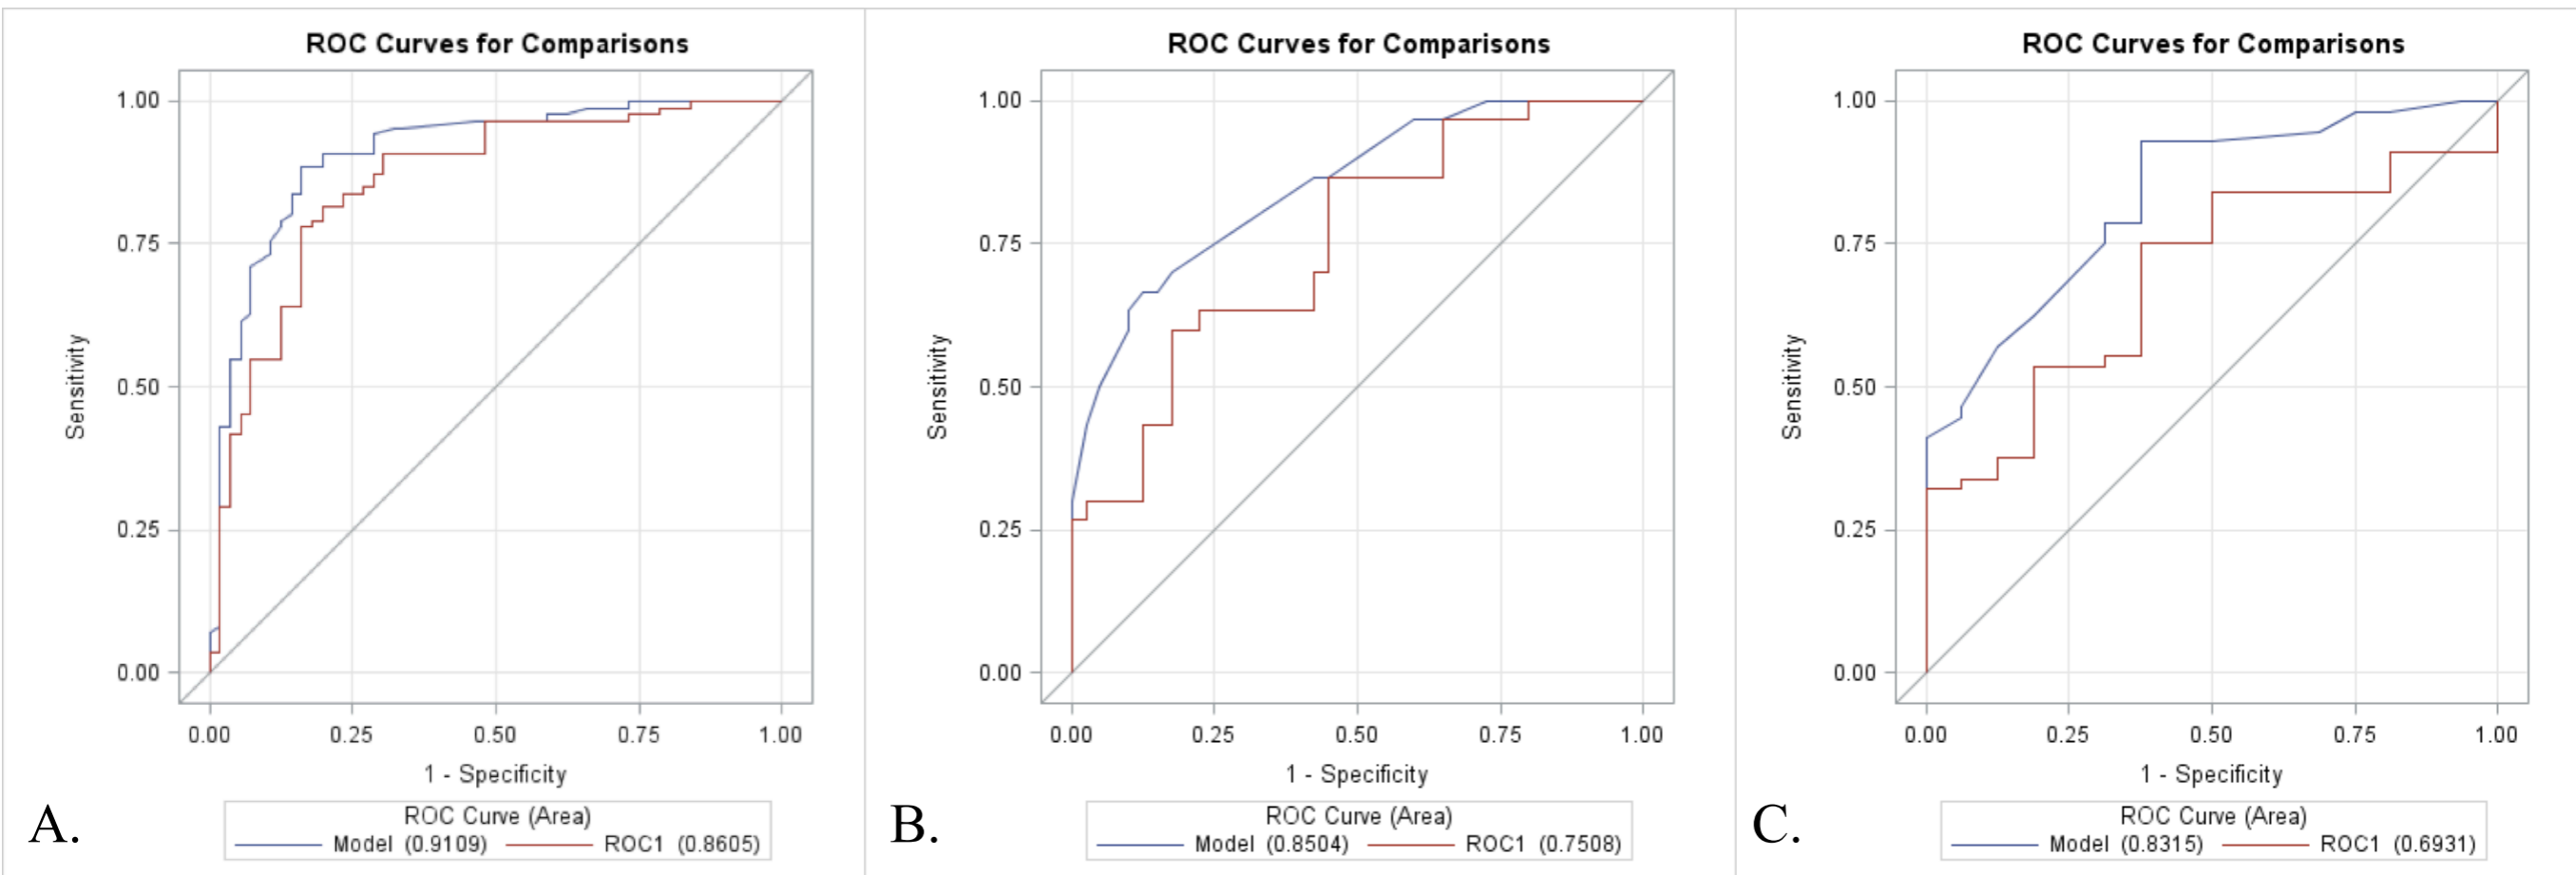

ROC curves are presented for all patients (A, n=152), and stratified by endovascular treatment (B, n=73) or no endovascular treatment (C, n=76).
